# Supplementary material
Source: PubMed Central journal article supplement (PMC9807187)
Supplement: NIHMS1860204-supplement-suppl_information.pdf [file NIHMS1860204-supplement-suppl_information.pdf]

**Molecular Cell, Volume 82**

**Supplemental information**

**The Mettl3 epitranscriptomic writer**

**amplifies p53 stress responses**

**Nitin Raj, Mengxiong Wang, Jose A. Seoane, Richard L. Zhao, Alyssa M. Kaiser, Nancie A. Moonie, Janos Demeter, Anthony M. Boutelle, Craig H. Kerr, Abigail S. Mulligan, Clare Moffatt, Shelya X. Zeng, Hua Lu, Maria Barna, Christina Curtis, Howard Y. Chang, Peter K. Jackson, and Laura D. Attardi**

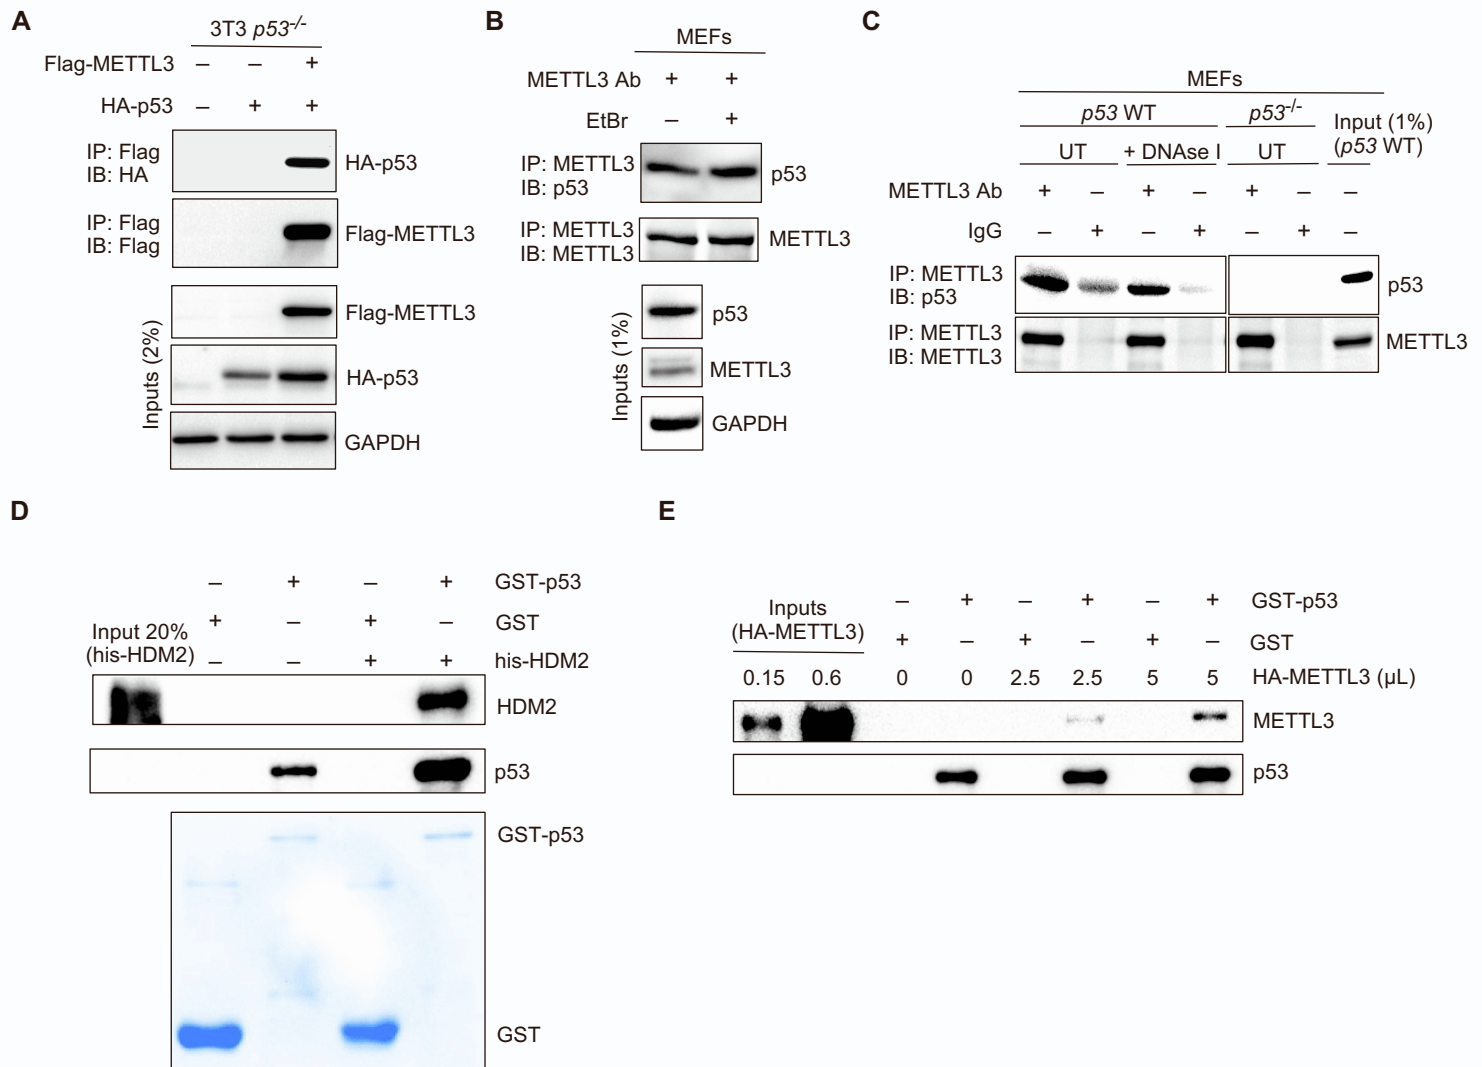

**Supplemental Figure 1.** p53 directly interacts with METTL3 independent of DNA, Related to Figure 1. (A) Flp-In-3T3 *p53*<sup>-/-</sup> cells were co-transfected with plasmids expressing Flag-METTL3 and HA-p53, and Flag-METTL3 was immunoprecipitated with anti-Flag M2 magnetic beads and detected by immunoblotting with the indicated antibodies (*n*=2). (B) CoIP and immunoblot assay to test the nucleic acid dependence of interaction between endogenous p53 and METTL3 in *E1A;HRas*<sup>G12V</sup>-expressing MEFs. Lysates were pre-treated with ethidium bromide (EtBr) at 10 μg/ml prior to immunoprecipitations (*n*=2). (C) CoIP and immunoblot assay to test DNA-dependence of interaction between endogenous p53 and METTL3 in lysates from MEFs pre-treated with DNase I (40 U/ml) to degrade DNA. IgG serves as negative control antibody. IPs in *p53*<sup>-/-</sup> cells demonstrate the specificity of the p53 antibody (*n*=2). Representative immunoblots are shown in all panels. (D) GST pull-down assays with GST and GST-tagged p53 after incubation with purified his-tagged HDM2. (Top) Binding of his-tagged HDM2 was detected by immunoblot analysis with antibodies against HDM2. (Bottom) Coomassie stained gel shows GST and GST-p53 proteins. (E) GST pull-down assays with GST and GST-tagged p53 after incubation with *in vitro* translated HA-METTL3. Binding of HA-METTL3 was detected by immunoblot analysis with antibodies against METTL3.

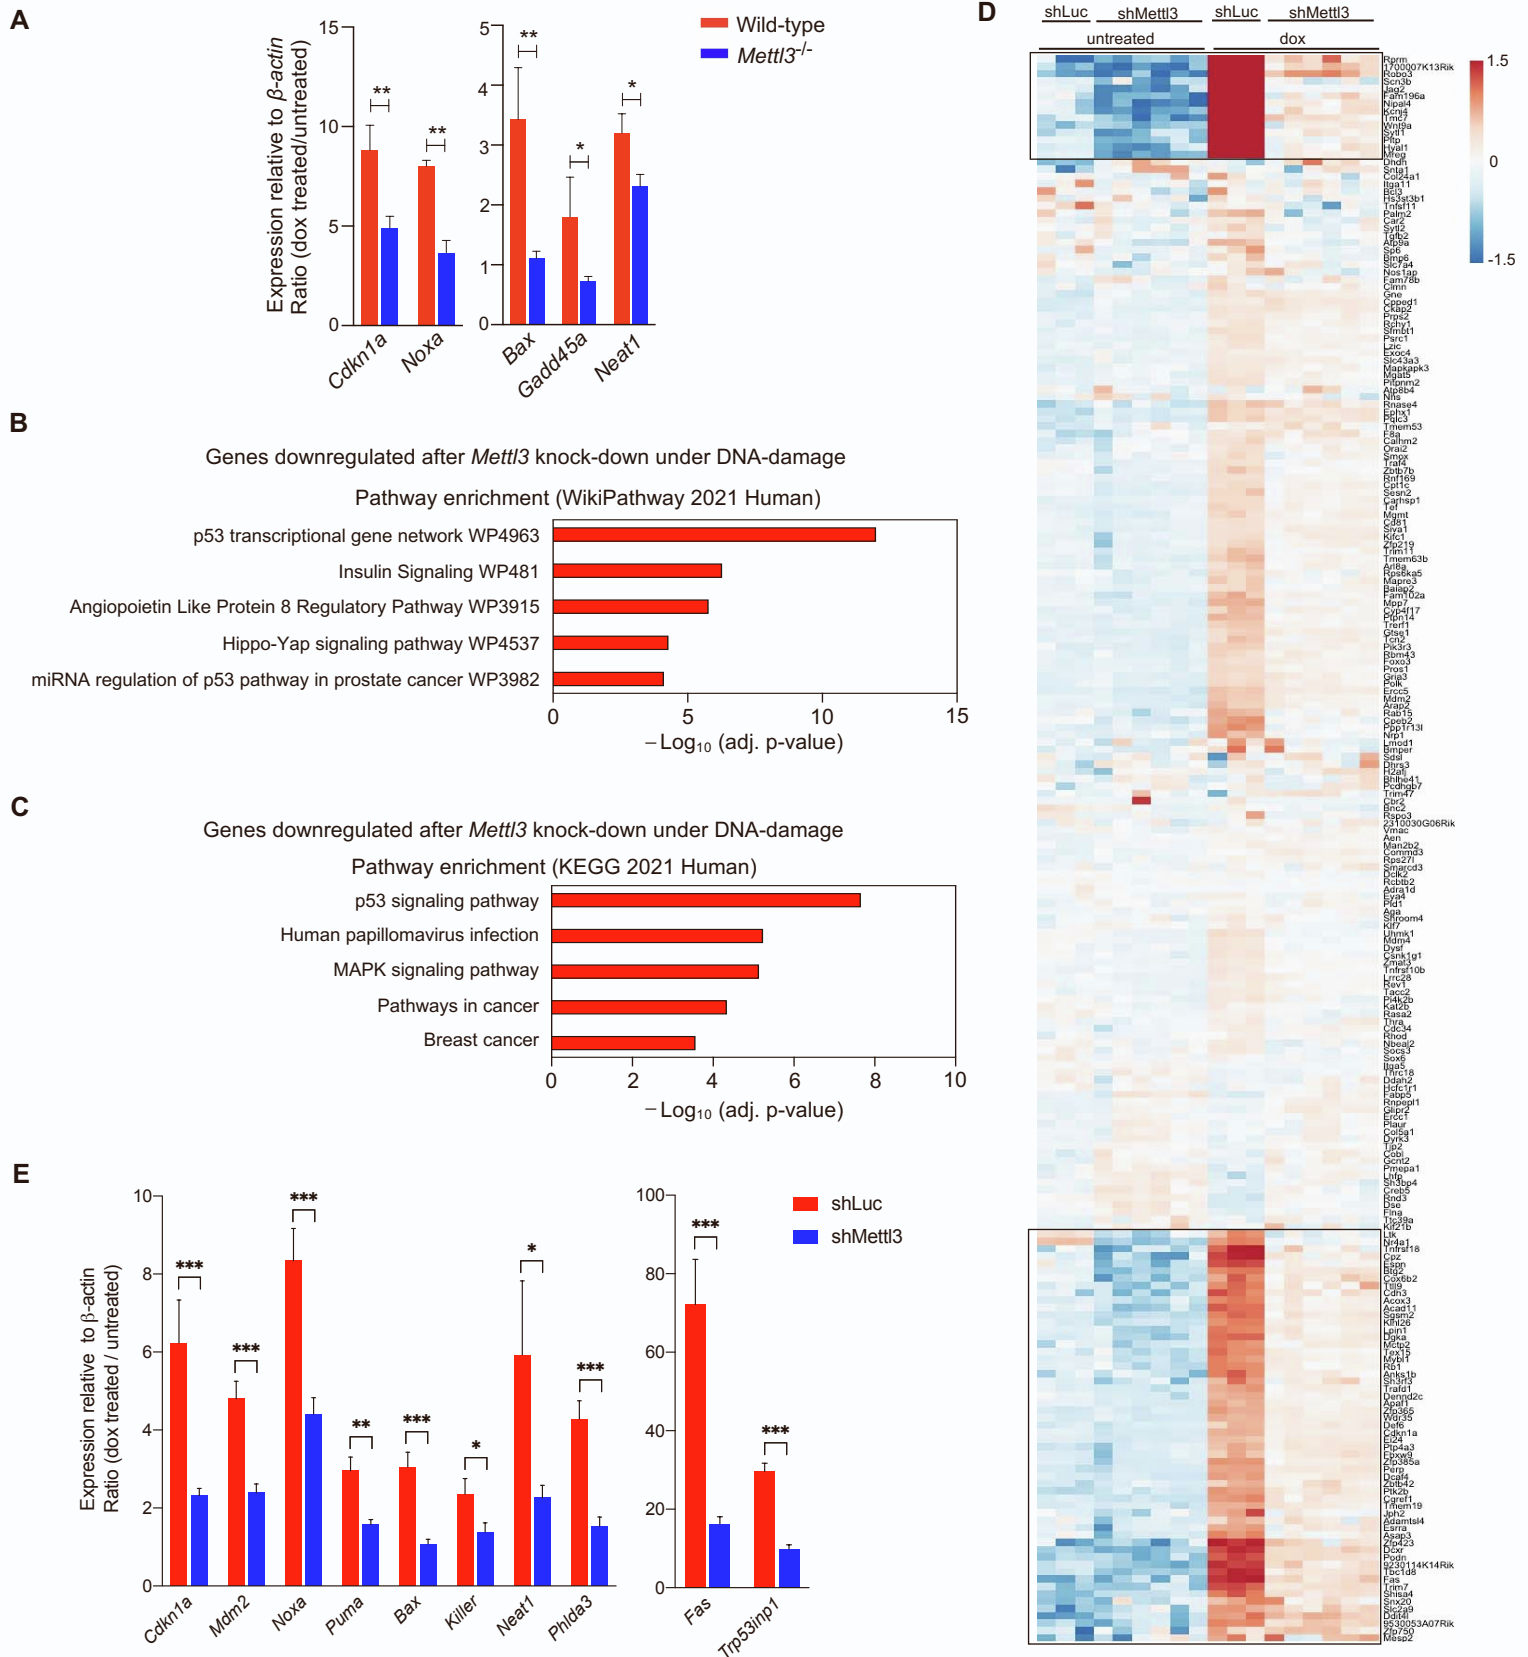

**Supplemental Figure 2.** *Mett13* deficiency impairs p53 target gene induction in response to DNA damage, Related to Figure 2. (A) Induction of p53 target genes after 6 hours dox (0.2  $\mu$ g/mL) in *Mett13*<sup>-/-</sup> ES cells relative to wild-type cells, normalized to  $\beta$ -Actin. *Mett13*<sup>-/-</sup> depicts mean of two different *Mett13* null cell lines. Data are mean  $\pm$  s.e.m. of at least three biological replicates each with three technical replicates. *P* values were determined by the unpaired two-tailed Student's *t*-test. \**P*<0.05, \*\**P*<0.01. (B) The top five expression signatures enriched in genes downregulated in dox-treated *E1A*; *HRas*<sup>G12V</sup> shMett13-2 MEFs relative to dox-treated *E1A*; *HRas*<sup>G12V</sup> shLuc MEFs, as identified by Enrichr analysis of WikiPathway 2021 Human (B) and KEGG 2021 Human (C) data sets. (D) Heat map showing expression patterns of all previously characterized p53-bound and p53-regulated target genes in *E1A*; *HRas*<sup>G12V</sup> (Valente et al., 2020) in RNA-seq analysis of untreated or dox-treated shLuc and shMett13 *E1A*; *HRas*<sup>G12V</sup> MEFs. Genes with the highest magnitude changes, within the black boxes, were selected to generate the heat map shown in figure 2G. (E) qRT-PCR analysis of expression of p53 target genes after 6 hours dox (0.2  $\mu$ g/mL) in shLuc and shMett13 shRNA-expressing *E1A*; *HRas*<sup>G12V</sup> MEFs, normalized to  $\beta$ -Actin. shMett13 depicts mean of cell lines expressing either of the two different shRNAs targeting *Mett13*. Representative data are shown from two biological replicates each with three technical replicates and two different MEF lines per genotype were used. Data are mean of fold induction (Ratio of dox treated / untreated)  $\pm$  s.e.m. *P* values were determined by the unpaired two-tailed Student's *t*-test. \**P*<0.05, \*\**P*<0.01, \*\*\**P*<0.001.

A

| shLuc (dox) |       |         |              | shMettl3-2 (dox) |       |         |              |
|-------------|-------|---------|--------------|------------------|-------|---------|--------------|
| Rank        | Motif | P-value | % of Targets | Rank             | Motif | P-value | % of Targets |
| 1           |       | 1E-916  | 71.6%        | 1                |       | 1E-1110 | 65.75%       |
| 2           |       | 1E-287  | 29.89%       | 2                |       | 1E-320  | 1.00%        |
| 3           |       | 1E-280  | 1.59%        | 3                |       | 1E-279  | 38.57%       |
| 4           |       | 1E-278  | 1.66%        | 4                |       | 1E-223  | 28.63%       |
| 5           |       | 1E-263  | 2.08%        | 5                |       | 1E-189  | 1.25%        |

B

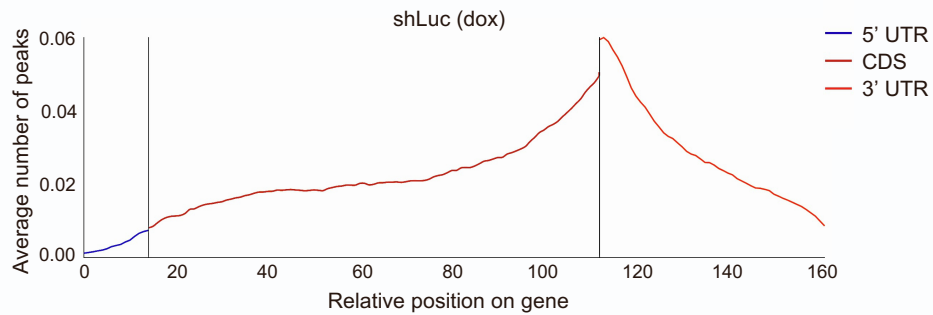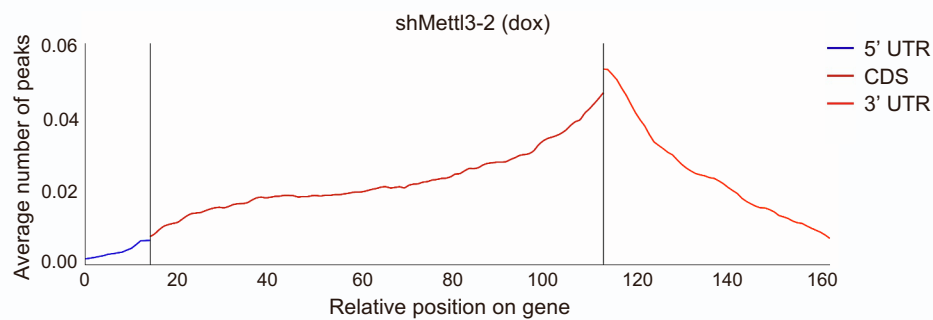

C

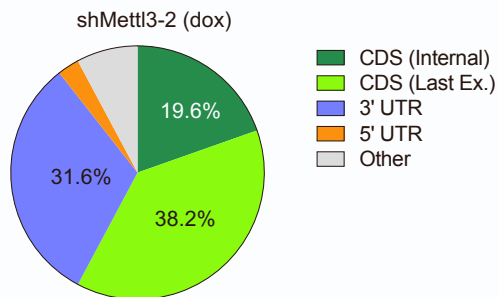

**Supplemental Figure 3.** Motif identification and distribution of m<sup>6</sup>A-peaks in doxorubicin treated *E1A;HRas<sup>G12V</sup>*-expressing MEFs, Related to Figure 4. (A) Top five sequence motifs enriched in m<sup>6</sup>A-modified mRNAs in dox treated MEFs expressing shLuc control or shMettl3 RNAs. (B) Metagene plot of mRNAs displaying m<sup>6</sup>A modification in dox treated MEFs expressing shLuc control or shMettl3 RNAs. Plot depicts average number of peaks mapped to certain genomic regions. The number of peaks is calculated for each region of every gene, the lengths of the regions are then normalized, and the average number of peaks for a set number of positions along the regions are calculated. (C) Pie chart of the frequency distribution of m<sup>6</sup>A peaks that map to the listed mRNA features in dox treated MEFs expressing shMettl3 RNA. m<sup>6</sup>A-IP reads were normalized to the total number of reads covering the m<sup>6</sup>A residue in the input.

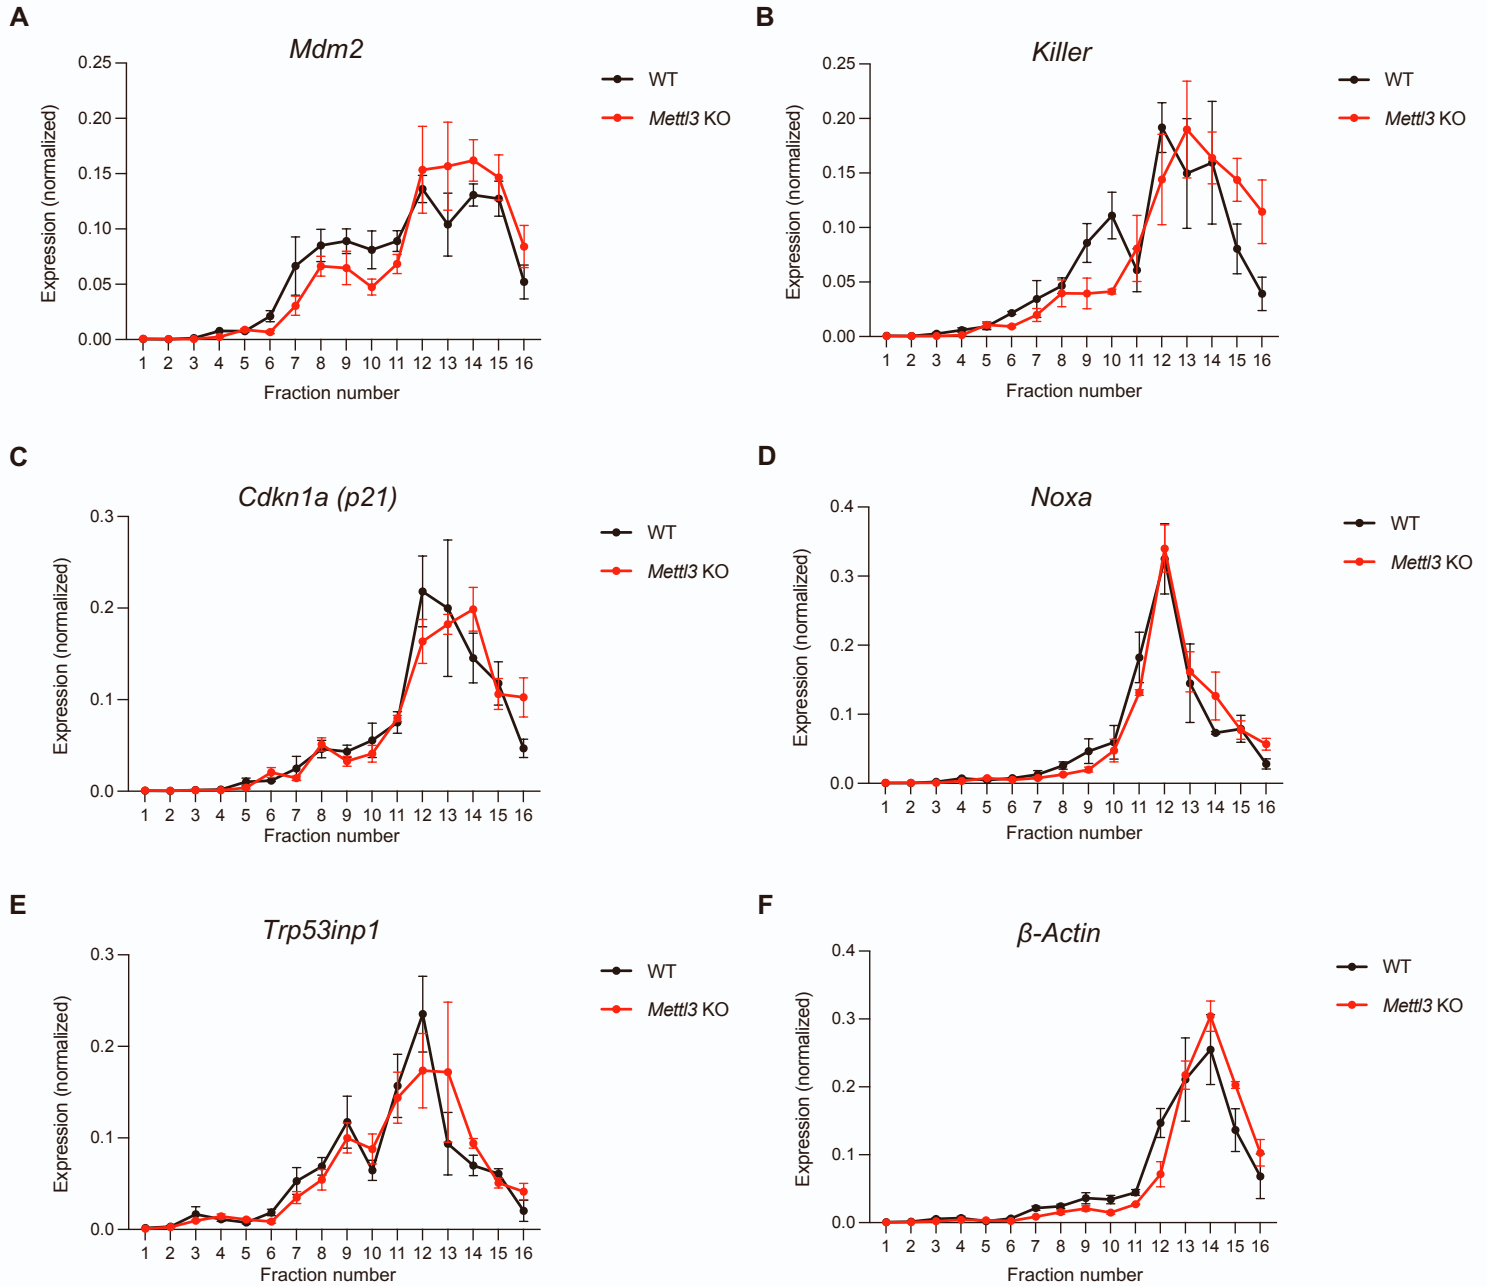

**Supplemental Figure 4.** Sucrose gradient polysome fractionation of mouse ES cells followed by RT-qPCR analysis of selected m<sup>6</sup>A-modified and unmodified p53 target genes, Related to Figure 4. RT-qPCR analysis of m<sup>6</sup>A-modified mRNAs, *Mdm2* (A) & *Killer* (B), unmodified mRNAs, *Cdkn1a*, *Noxa*, *Trp53inp1* (C-E) and control housekeeping gene  $\beta$ -Actin (F) from 15-45% sucrose density gradients from WT (black line) or *Mett13* KO (red line) mouse ES cells treated with 8 hours dox (0.2  $\mu$ g/mL). RT-qPCR Ct values were normalized to spike-in *in vitro* transcribed Renilla luciferase RNA to each fraction and then to the sum total of all fractions. Data are mean of 3 biological replicates  $\pm$  s.e.m.

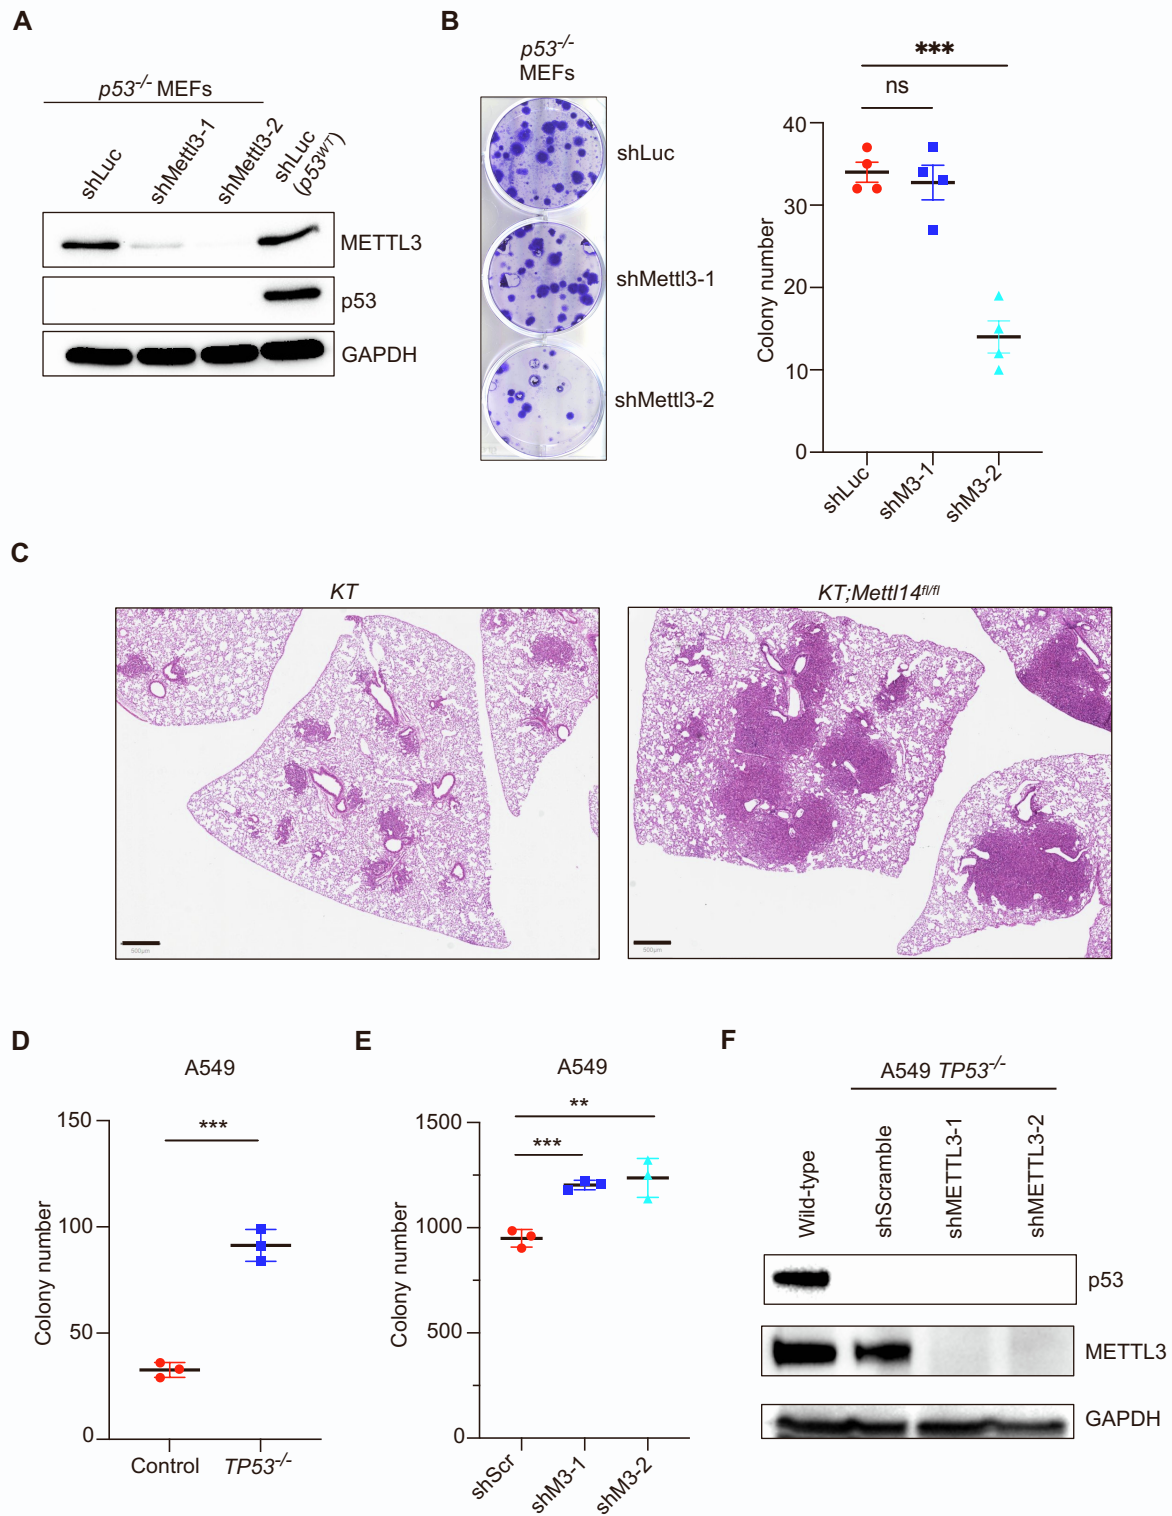

**Supplemental Figure 5.** METTL3 supports p53 in colony formation in MEFs and A549 cells and METTL14 has tumor suppressor activity in mouse lung adenocarcinoma, Related to Figures 6 and 7. (A) Immunoblotting for p53 and METTL3 proteins in *E1A;HRas<sup>G12V</sup>*-expressing *p53<sup>-/-</sup>* MEFs transduced with either shLuc or shMettl3 RNAs ( $n=2$ ). (B) Low density plating assay to assess clonogenic potential of *E1A;HRas<sup>G12V</sup>*-expressing *p53<sup>-/-</sup>* MEFs transduced with lentiviruses expressing either shLuc or shMettl3 RNAs. (Left) Representative crystal-violet stained colonies are shown. (Right) Average colony number ( $n=2$  with triplicate samples). (C) Representative images of H&E staining of lung tissue section from control *KT* (left panel) and *KT;Mettl14<sup>fl/fl</sup>* (right panel) mice infected with Ad-CMV-Cre adenovirus. Scale bar = 500  $\mu$ M.  $P$  values were determined by the unpaired two-tailed Student's  $t$ -test. \*\*\* $P < 0.001$ , ns=not significant. (D) Clonogenic potential of *TP53* WT and *TP53<sup>-/-</sup>* A549 cell lines assayed using low density plating assay. Dots represent average colony numbers from triplicate samples ( $n=1$ ). (E) Anchorage-independent growth of A549 cells upon the introduction of control shScramble (shScr) or two different shRNAs against *METTL3* (shM3-1 and shM3-2). Dots represent average colony numbers for triplicate samples from two independent experiments. (F) Immunoblotting for endogenous p53 and Flag-METTL3 proteins in A549 *TP53<sup>-/-</sup>* cells. GAPDH serves as loading control.  $P$  values were determined by the unpaired two-tailed Student's  $t$ -test. \*\* $P < 0.01$ , \*\*\* $P < 0.001$ .

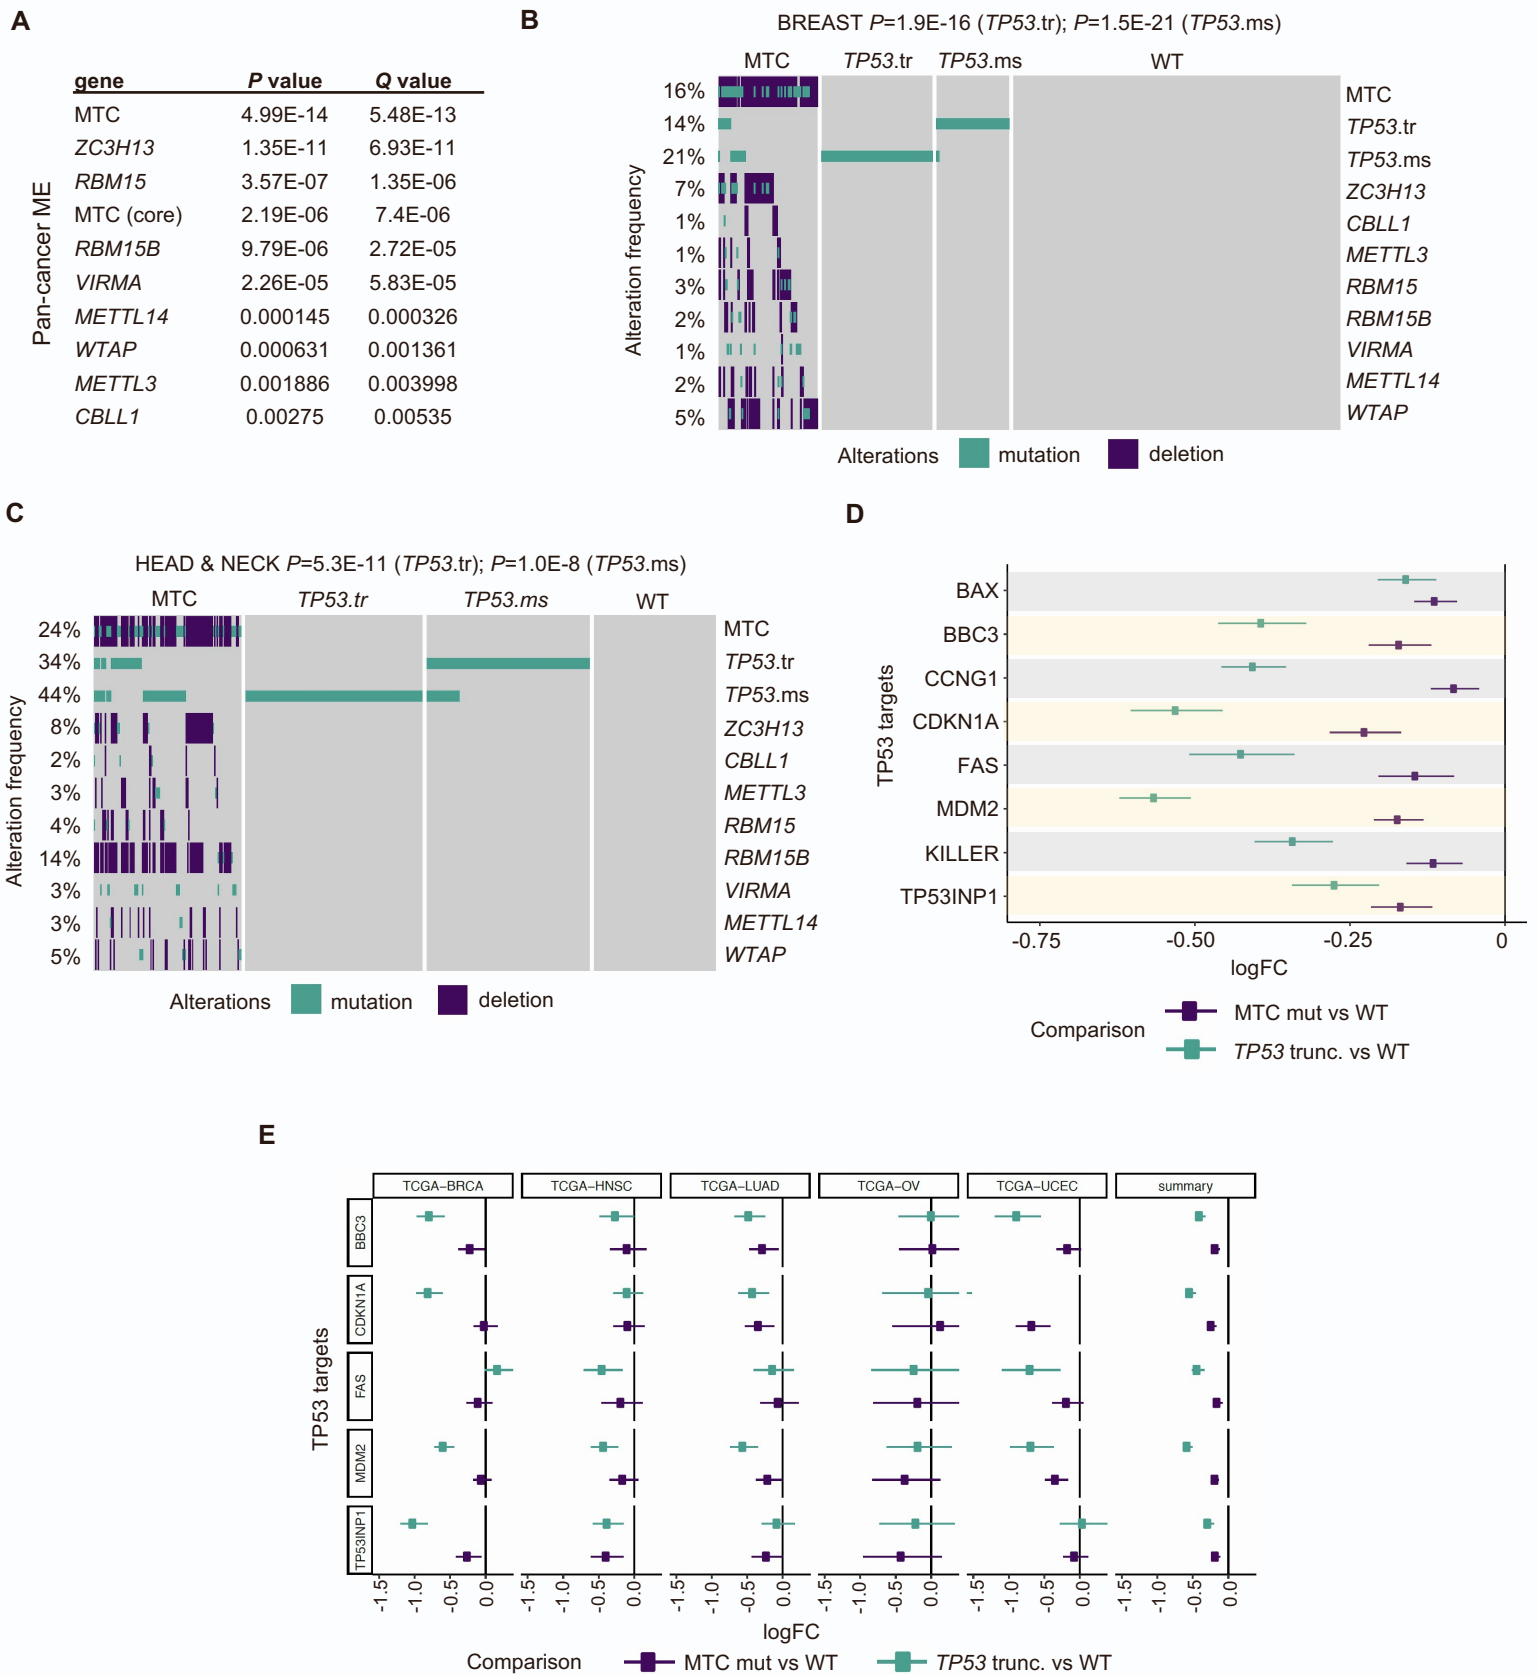

**Supplemental Figure 6.** Mutual Exclusivity between *TP53* and *METTL3* methyltransferase complex and differential expression (DE) analysis of *TP53* target genes in human cancers, Related to Figure 7. (A) Pan-cancer mutual exclusivity analysis using DISCOVER algorithm. (B & C) Oncoplots showing alteration frequencies of *METTL3*-*METTL14* methyltransferase complex components in human breast and head & neck cancers. In A-C, MTC refers to any of the complex members while MTC (core) refers to *METTL3*, *METTL14* and *WTAP*. *TP53.tr* refers to truncation mutations, while *TP53.ms* refers to missense mutations in *TP53*. *P* and *Q* values show significance of DISCOVER test unadjusted and adjusted for multiple testing. (D) Dots represent log fold change expression of select p53 targets in *METTL3* complex (MTC) mutant vs wild-type and *TP53* truncation mutant vs wild-type tumors. Summary represents DE in 33 TCGA cancer types. (E) Dots represent log fold change expression of select p53 targets in *METTL3* complex (MTC) mutant vs wild-type and *TP53* truncation mutant vs wild-type tumors, in human lung adenocarcinoma (LUAD), breast cancer (BRCA), ovarian cancer (OV), uterine corpus endometrial carcinoma (UCEC) and head and neck squamous cell carcinoma (HNSCC). Summary represents DE in the five cancer types shown on the left. In (D) and (E), MTC refers to any of the *METTL3* complex members, while *TP53 trunc.* refers to truncation mutations in *TP53*.

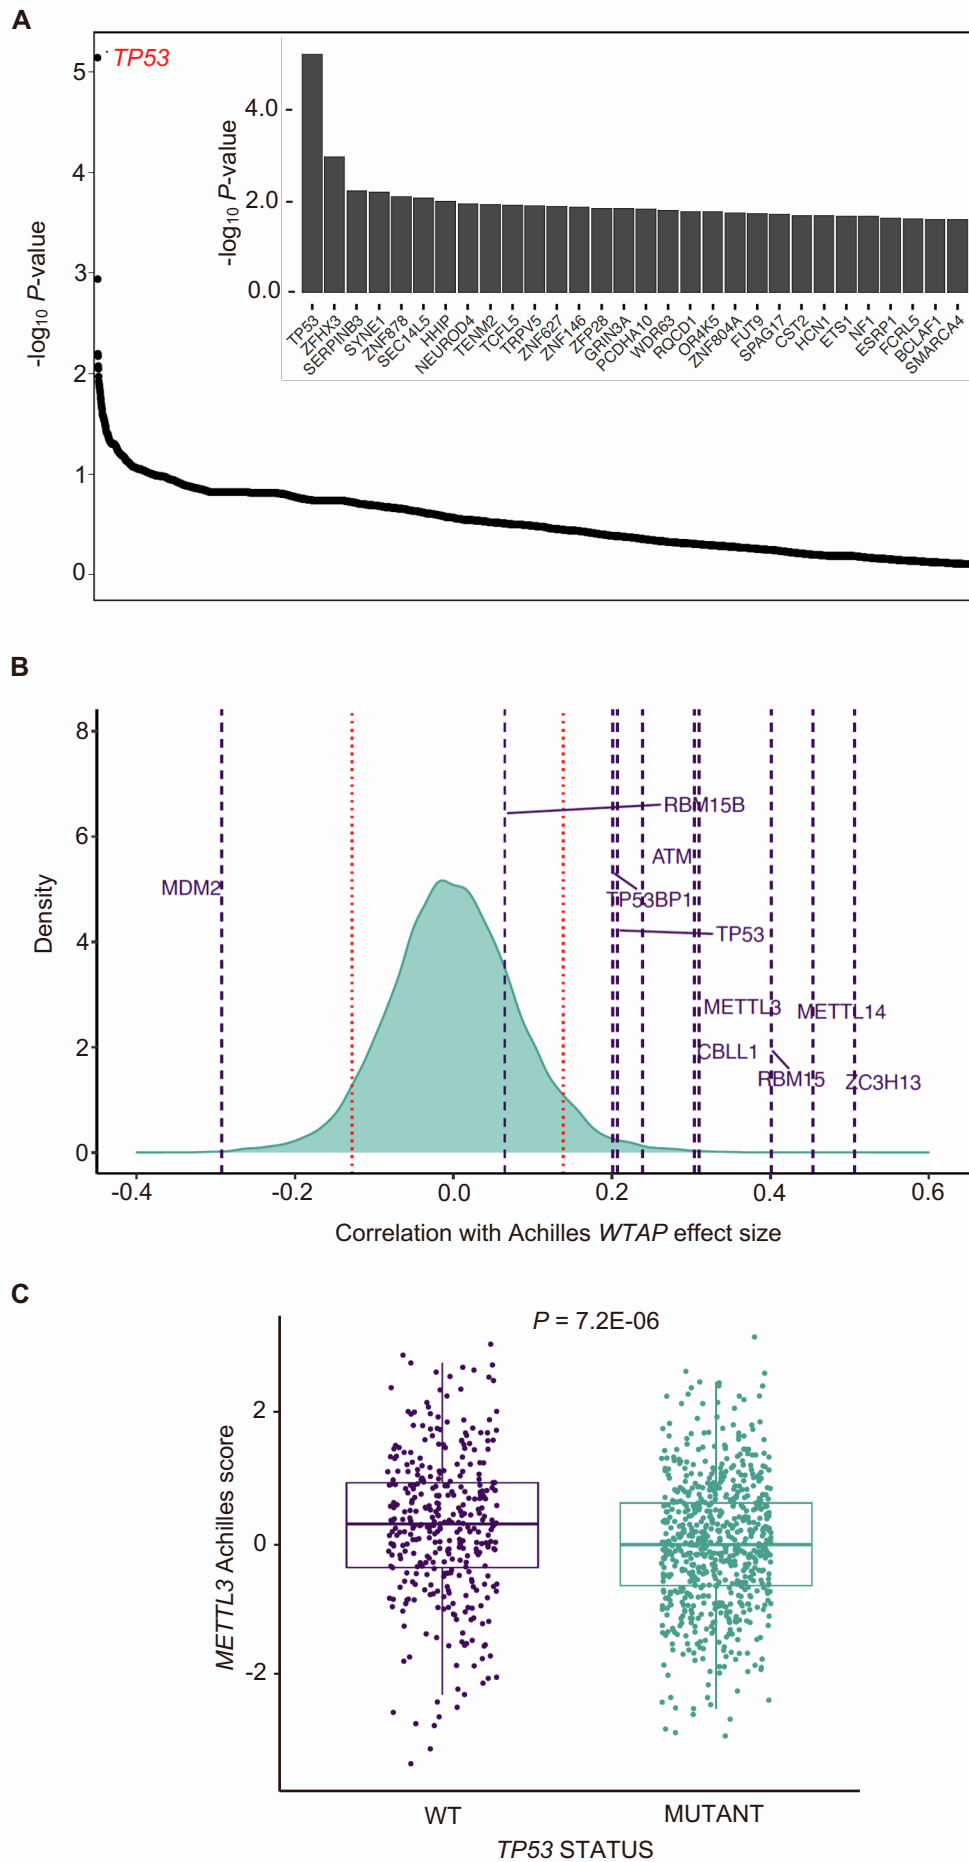



Supplemental Table 1

| p53 BP        | Mean NSAF | p53 BP       | Mean NSAF | p53 BP   | Mean NSAF | p53 BP   | Mean NSAF |
|---------------|-----------|--------------|-----------|----------|-----------|----------|-----------|
| 4921504E06RIK | 0.000223  | EIF4G1       | 0.004144  | MYO5A    | 0.000932  | RRBP1    | 0.000862  |
| ABCF2         | 0.001081  | ELAVL1       | 0.000662  | NAGLU    | 0.000893  | RREB1    | 0.000256  |
| ABRAXAS2      | 0.001232  | EPB41L3      | 0.002060  | NCL      | 0.004723  | RTCB     | 0.002644  |
| ACACA         | 0.001319  | EPRS         | 0.000795  | NDC1     | 0.001240  | RUVBL1   | 0.001822  |
| ACADSB        | 0.000340  | FARP1        | 0.000863  | NEDD4    | 0.000764  | SEPT11   | 0.000769  |
| ACTA2         | 0.000819  | FHOD1        | 0.001053  | NSUN7    | 0.000521  | SEPT9    | 0.000352  |
| ACTBL2        | 0.000240  | FLNC         | 0.001240  | OFD1     | 0.000272  | SERBP1   | 0.001685  |
| ACTN1         | 0.000684  | FLT4         | 0.000592  | OPLAH    | 0.000488  | SF3B1    | 0.001116  |
| ACTN4         | 0.000075  | FN1          | 0.001540  | PABPC1   | 0.002589  | SF3B3    | 0.001284  |
| ACTR1B        | 0.001354  | FUS          | 0.001279  | PAWR     | 0.002055  | SFPQ     | 0.001998  |
| ADGRV1        | 0.000356  | G3BP1        | 0.002527  | PCDHGC4  | 0.000224  | SLC25A12 | 0.001768  |
| ADRM1         | 0.000745  | GABBR2       | 0.014335  | PDE4D    | 0.000660  | SLC25A4  | 0.000783  |
| AHNAK         | 0.006850  | GAPDH        | 0.003468  | PDZD8    | 0.000204  | SMARCE1  | 0.000374  |
| AHNAK2        | 0.000985  | GEMIN5       | 0.000204  | PFKL     | 0.000360  | SMC2     | 0.000696  |
| AIMP1         | 0.000482  | GJC2         | 0.000669  | PFKM     | 0.000966  | SMC3     | 0.000391  |
| ASPH          | 0.000331  | GLMN         | 0.001037  | PHC2     | 0.001414  | SMG5     | 0.003057  |
| ATAD3A        | 0.006702  | GM10334      | 0.008535  | PI4KA    | 0.000425  | SMG7     | 0.003877  |
| ATP5A1        | 0.001387  | GM5414       | 0.000076  | PITRM1   | 0.000753  | SNRNP200 | 0.001320  |
| C2CD2L        | 0.000229  | GMPS         | 0.000909  | PIWIL2   | 0.000509  | SNX21    | 0.000494  |
| CALD1         | 0.002456  | GSTM5        | 0.000372  | PKM      | 0.000426  | SNX25    | 0.000742  |
| CAPRIN1       | 0.000847  | HADHA        | 0.001102  | PML      | 0.000501  | SOAT1    | 0.000649  |
| CAVIN2        | 0.001352  | HDLBP        | 0.000352  | PPP1R12A | 0.001376  | SP3      | 0.000272  |
| CCDC39        | 0.000340  | HELLS        | 0.000560  | PPP1R18  | 0.000696  | SPECC1   | 0.001036  |
| CCT2          | 0.002940  | HNRNPA1      | 0.002042  | PRPF19   | 0.001580  | SPEN     | 0.000447  |
| CCT3          | 0.001675  | HNRNPAB      | 0.001656  | PRPF3    | 0.000759  | SPTAN1   | 0.000465  |
| CCT4          | 0.001847  | HNRNPD       | 0.001566  | PRPF6    | 0.000760  | SPTBN1   | 0.000635  |
| CCT5          | 0.002269  | HNRNPH1      | 0.002860  | PSMA1    | 0.002276  | SRSF2    | 0.002069  |
| CCT6A         | 0.002208  | HNRNPK       | 0.001424  | PSMA2    | 0.001318  | SWT1     | 0.000340  |
| CCT7          | 0.002086  | HNRNPL       | 0.002632  | PSMA3    | 0.001836  | SYNE1    | 0.000102  |
| CCT8          | 0.003049  | HNRNPM       | 0.001819  | PSMA4    | 0.000908  | SYTL4    | 0.004656  |
| CDK12         | 0.000493  | HNRNPU       | 0.004875  | PSMA5    | 0.001291  | TAF15    | 0.001246  |
| CNOT1         | 0.000152  | HNRNPUL2     | 0.002646  | PSMA6    | 0.001689  | TCP1     | 0.003513  |
| COL1A1        | 0.000152  | HPS3         | 0.000038  | PSMA7    | 0.001710  | THBS1    | 0.000458  |
| COPB1         | 0.000713  | HSPA4        | 0.000351  | PSMB1    | 0.001889  | THOC2    | 0.001849  |
| COPB2         | 0.000696  | HSPH1        | 0.001918  | PSMB2    | 0.001188  | TLN1     | 0.000722  |
| CTNNA1        | 0.000849  | HYDIN        | 0.002615  | PSMB3    | 0.000922  | TMPO     | 0.001927  |
| CUL1          | 0.002177  | IARS         | 0.000653  | PSMB4    | 0.001033  | TNRC6B   | 0.000204  |
| CUL5          | 0.001355  | IL1RAPL1     | 0.001266  | PSMB5    | 0.001928  | TPM4     | 0.000418  |
| CYLC1         | 0.001019  | IQGAP3       | 0.001172  | PSMB6    | 0.000994  | TRIM24   | 0.002180  |
| DAPK1         | 0.000102  | JUP          | 0.003969  | PSMB7    | 0.001134  | TRIM28   | 0.003184  |
| DCTN2         | 0.005310  | KIF20B       | 0.000836  | PSMC1    | 0.004313  | TRRAP    | 0.005174  |
| DCTN4         | 0.001812  | KIF26A       | 0.000102  | PSMC2    | 0.005191  | TTN      | 0.000709  |
| DDX1          | 0.001865  | KIF4         | 0.000129  | PSMC3    | 0.004956  | TUFM     | 0.000389  |
| DDX17         | 0.001622  | KIF5B        | 0.000608  | PSMC4    | 0.003626  | TXLNG    | 0.000244  |
| DDX3X         | 0.004738  | LARP1        | 0.000558  | PSMC5    | 0.005480  | UBAP2L   | 0.003702  |
| DDX42         | 0.000408  | LETM1        | 0.000764  | PSMD1    | 0.006147  | UBC      | 0.013240  |
| DLAT          | 0.000643  | LOC105242472 | 0.000436  | PSMD12   | 0.003606  | UBR2     | 0.001401  |
| DOCK9         | 0.000114  | LOX          | 0.002025  | PSMD13   | 0.002487  | UBR4     | 0.000793  |
| DSG1B         | 0.000632  | LRPPRC       | 0.001426  | PSMD14   | 0.002128  | UBTF     | 0.001960  |
| DUSP8         | 0.000246  | MAP1A        | 0.000408  | PSMD2    | 0.007069  | USP7     | 0.001859  |
| DVL2          | 0.000645  | MAP1B        | 0.000669  | PSMD3    | 0.003821  | UTRN     | 0.001314  |
| DYNC1H1       | 0.001856  | MAP4         | 0.000332  | PSMD4    | 0.002189  | VARS     | 0.000660  |
| EEF1A2        | 0.000102  | MAPK3        | 0.000076  | PSMD6    | 0.002300  | VCPIP1   | 0.001030  |
| EEF1D         | 0.001147  | MARCKS       | 0.000986  | PSMD7    | 0.000852  | VPS35    | 0.000160  |
| EEF1G         | 0.000379  | MAST4        | 0.001698  | PSMD8    | 0.000811  | WDR5     | 0.000459  |
| EFCAB12       | 0.000187  | MCM3         | 0.000779  | RAD23A   | 0.000595  | ZBTB25   | 0.000176  |
| EFEMP1        | 0.000986  | MCM5         | 0.001131  | RAD50    | 0.001240  | ZFP819   | 0.000204  |
| EFTUD2        | 0.000775  | MCM9         | 0.000288  | RAI14    | 0.001495  |          |           |
| EIF2S1        | 0.000271  | MDM2         | 0.015265  | RALGAPA2 | 0.009169  |          |           |
| EIF3B         | 0.002838  | MDM4         | 0.001648  | RANGAP1  | 0.000624  |          |           |
| EIF3F         | 0.001811  | METTL3       | 0.000344  | RBM14    | 0.002547  |          |           |
| EIF3H         | 0.002058  | MFGE8        | 0.002276  | RBMXL1   | 0.003311  |          |           |
| EIF3I         | 0.001239  | MOGS         | 0.000625  | RHOX5    | 0.001065  |          |           |
| EIF3L         | 0.002683  | MRVI1        | 0.000306  | RNH1     | 0.009212  |          |           |
| EIF4B         | 0.001059  | MYH9         | 0.001024  | RPAP1    | 0.000673  |          |           |

**Supplemental Table 1.** List of p53 binding proteins (BP) identified in p53-LAP AP-MS under DNA-damage treatment, Related to Figure 1. Numbers indicate the mean NSAF values from three replicate experiments.

Supplemental Table 4

qRT-PCR primers:

| <b>Gene</b>      | <b>Forward Primer (5'-3')</b> | <b>Reverse Primer (5'-3')</b> |
|------------------|-------------------------------|-------------------------------|
| <i>Cdkn1a</i>    | CACAGCTCAGTGGACTGGAA          | ACCCTAGACCCACAATGCAG          |
| <i>Noxa</i>      | GCAGAGCTACCACCTGAGTTC         | CTTTTGCGACTTCCCAGGCA          |
| <i>Bax</i>       | TGAAGACAGGGCCTTTTTG           | AATTCGCCGGAGACTCG             |
| <i>Gadd45a</i>   | CTCGGCTGCAGAGCAGAAGA          | GGCACAGTACCACGTTATCG          |
| <i>Neat1</i>     | CCTGGGGATGAGGCCTGGTCT         | GGCCAGAGCTGTCCGCC             |
| <i>Mdm2</i>      | CTGTGTCTACCGAGGGTGCT          | CGCTCCAACGGACTTTAACA          |
| <i>Puma</i>      | GCGGCGGAGACAAGAAGA            | AGTCCCATGAAGAGATTGTACATGAC    |
| <i>Killer</i>    | AACACGGAACCTGGCAAGA           | TTCCGTTTACCGGAACCA            |
| <i>Phlda3</i>    | TTCGCCCGCATCAAAGCCGT          | AGGGGGCAGCGGAAGTCG AT         |
| <i>Fas</i>       | CTGCGATGAAGAGCATGGTT          | GCGCAGCGAACACAGTGT            |
| <i>Trp53inp1</i> | CTTCTTCCAGCCAAGAACCA          | CTGAGAAACCAGGGCAGGTA          |
| <i>β-Actin</i>   | TCCTAGCACCATGAAGATCAAGATC     | CTGCTTGCTGATCCACATCTG         |

ChIP-qPCR primers:

| <b>Gene</b>      | <b>Forward Primer (5'-3')</b> | <b>Reverse Primer (5'-3')</b> |
|------------------|-------------------------------|-------------------------------|
| <i>Cdkn1a</i>    | GAGACCAGCAGCAAATCG            | CAGCCCCACCTCTTCAATTC          |
| <i>Noxa</i>      | AAGCAATTTGGGGTTGAG            | GAGCGAAGTGGAGCAGGTC           |
| <i>Neat1</i>     | GAATCTGCAAGCAAGGCCCGG         | GAGCAAGCCAGCACTTGCCACATA      |
| <i>Mdm2</i>      | CTTCCTGTGGGGCTGGTC            | CGGGGCAGCGTTTAAATAAC          |
| <i>Killer</i>    | GGGTTTCGGATGAGCTGACA          | CAAGCAGCAACGCAAAGCTA          |
| <i>Trp53inp1</i> | CTCACGTAAGTGCGGGCTAC          | GGAGAGAGTCCGGCATGAAA          |
